# Supplementary material
Source: PubMed Central journal article supplement (PMC5822434)
Supplement: NIHMS943129-supplement-supplemental_figures_with_legend.pdf [file NIHMS943129-supplement-supplemental_figures_with_legend.pdf]

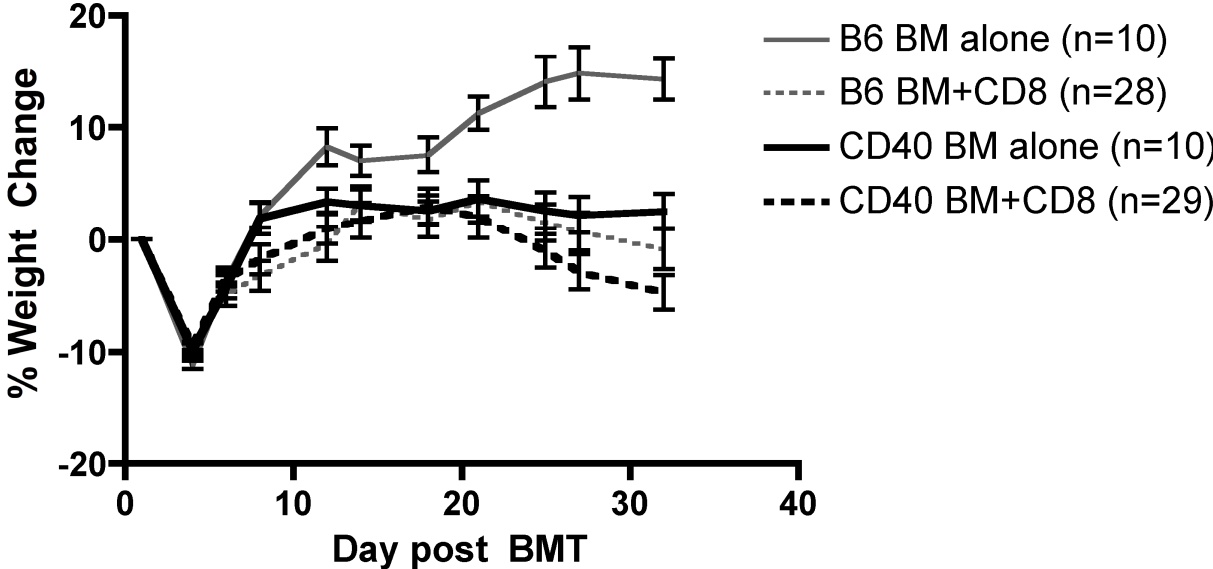

Supplemental Figure 1.

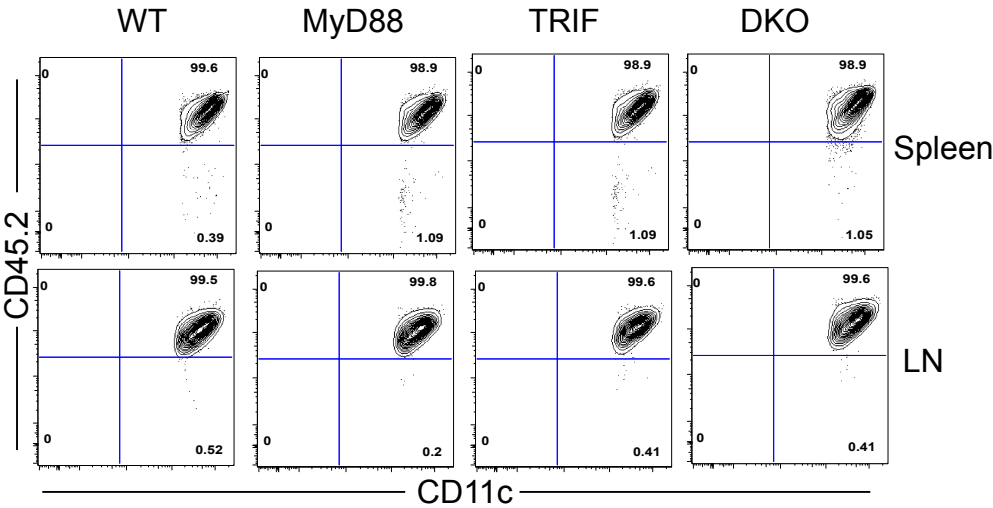

Supplemental Figure 2.

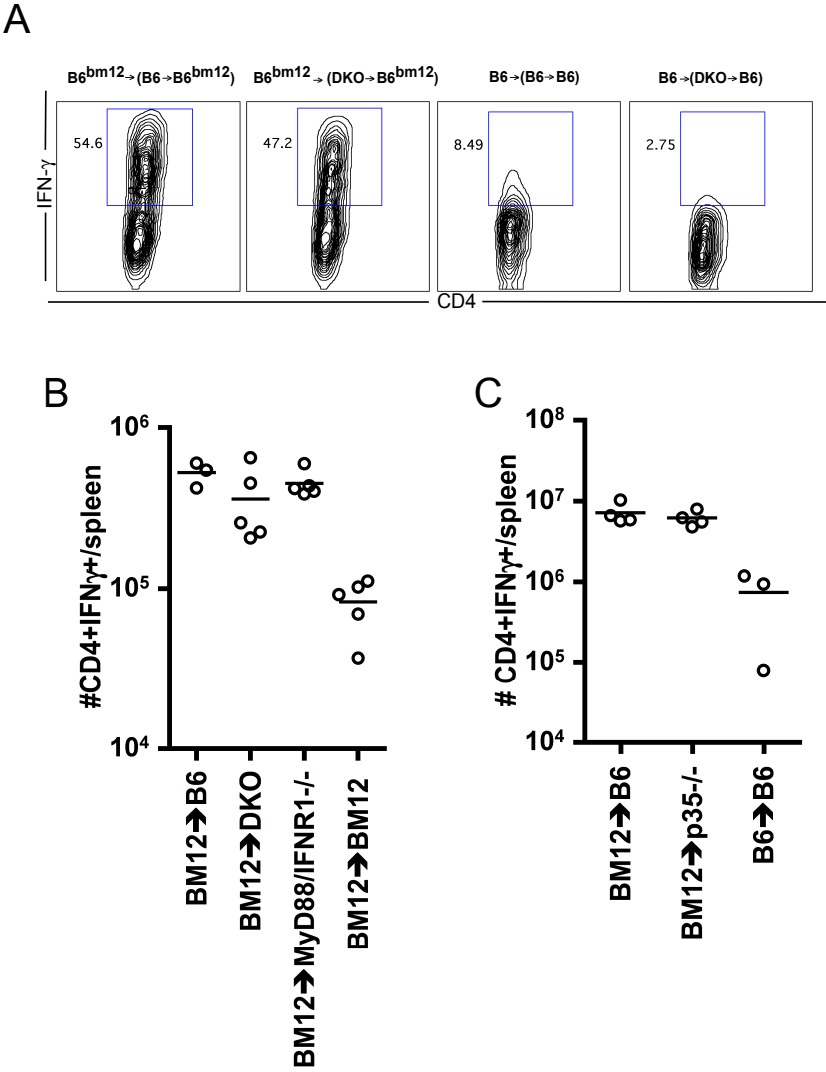

Supplemental Figure 3.

**Supplemental Figure 1.** B6 wild type of B6 CD40<sup>-/-</sup> mice were irradiated and reconstituted with C3H.SW BM, with no T cells or with 2-3 x 10<sup>6</sup> C3H.SW CD8 cells. Data combined from two independent experiments. *P*<0.5 comparing wt BM alone vs. wt CD8 from day+14; *P*<0.05 since day+25 comparing CD40<sup>-/-</sup> BM alone vs CD8; wt and CD40<sup>-/-</sup> CD8 recipient groups did not differ at any time. Wt BM alone mice gained more weight than did CD40<sup>-/-</sup> BM alone recipients (*P*<0.05 since +14) likely because wt mice were younger with starting weights 10-15% lower than were CD40<sup>-/-</sup> mice.

**Supplemental Figure 2.** Representative flow cytometry of spleen and LN of CD45.1 recipients of CD45.2 wt, MyD88<sup>-/-</sup>, TRIF<sup>-/-</sup> or DKO BM. Data are gated on lineage-PI-CD11c<sup>+</sup> cells. Shown is CD11c vs CD45.2 (donor).

**Supplementary Figure 3. B6<sup>bm12</sup> CD4 cells make IFN- $\gamma$  when transplanted into mice with DKO or p35<sup>-/-</sup> APCs.** A. wt $\rightarrow$ B6<sup>bm12</sup>, MyD88<sup>-/-</sup> $\rightarrow$ B6<sup>bm12</sup>, TRIF<sup>-/-</sup> $\rightarrow$ B6<sup>bm12</sup>, and DKO $\rightarrow$ B6<sup>bm12</sup> BM chimeric mice were reirradiated and reconstituted with B6<sup>bm12</sup> BM and CD4<sup>+</sup>CD44<sup>-</sup>CD62L<sup>+</sup> naïve T cells. Mice were sacrificed and day +7 and splenocytes were analyzed for intracellular cytokines. Shown are representative plots gating on live (PI-) CD4 cells. B. Wt, DKO, MyD88/IFNAR1<sup>-/-</sup> and B6<sup>bm12</sup> mice were irradiated and reconstituted with B6<sup>bm12</sup> BM and sort-purified CD4<sup>+</sup>CD62L<sup>+</sup>CD44<sup>-</sup> B6<sup>bm12</sup> naïve T cells. Mice were sacrificed on day 7 and the numbers of IFN- $\gamma$ <sup>+</sup> CD4 cells were enumerated. Data are representative of at least 2 experiments. *P*>0.25 comparing B6<sup>bm12</sup> $\rightarrow$ B6 to B6<sup>bm12</sup> $\rightarrow$ DKO or B6<sup>bm12</sup> $\rightarrow$ MyD88/IFNAR1<sup>-/-</sup> recipients. *P*≤0.004 comparing any B6 host to the B6<sup>bm12</sup> $\rightarrow$ B6<sup>bm12</sup> syngeneic control. C. B6 and B6 p35<sup>-/-</sup> mice were transplanted and analyzed as in B. Additionally B6 mice were irradiated and reconstituted with B6 BM and sort-purified CD4<sup>+</sup>CD62L<sup>+</sup>CD44<sup>-</sup> B6 naïve T cells as a syngeneic control. *P*=0.49 comparing allogeneic B6 and p35 recipients. *P*=0.029 comparing either allogeneic recipient group versus the syngeneic B6 control group.
